# Supplementary material for: Characteristics and Outcomes of Tracheostomized Patients With and Without COVID-19
Source: PubMed Central journal article supplement — Crit Care Explor. 2023 Aug 3;5(8):e0950. doi: 10.1097/CCE.0000000000000950 (PMC10403025; doi:10.1097/cce.0000000000000950), 2023-08-03
Supplement: cc9-5-e0950-s001.pdf [file cc9-5-e0950-s001.pdf]

## Supplementary Data

**Table 1. Comparison of Characteristics of Tracheostomy Performance between Patients With And Without COVID-19**

| Tracheostomy Characteristics                 | COVID-19 negative (n=398) | COVID-19 positive (n=206) | P-value          |
|----------------------------------------------|---------------------------|---------------------------|------------------|
| <i>Tracheostomy type (%)</i>                 |                           |                           | 0.258            |
| Open                                         | 57 (14.3)                 | 22 (10.7)                 |                  |
| Percutaneous                                 | 341 (85.7)                | 184 (89.3)                |                  |
| <i>Specialty performing tracheostomy (%)</i> |                           |                           | <b>&lt;0.001</b> |
| ENT                                          | 57 (14.3)                 | 16 (7.8)                  |                  |
| General surgery                              | 87 (21.9)                 | 73 (35.4)                 |                  |
| CTS                                          | 93 (23.4)                 | 56 (27.2)                 |                  |
| ICU                                          | 161 (40.5)                | 61 (29.6)                 |                  |

Note – except where indicated, data are number of patients, with percentages in parentheses. Variables are summarized as frequencies and percentages. Differences in distributions of characteristics of those with and those without COVID-19 were analyzed Chi-squared tests. Bold indicates statistical significance ( $p < 0.05$ ). COVID-19=coronavirus disease-2019; ENT=ear, nose, and throat; CTS=cardiothoracic surgery; ICU=intensive care unit.
